# Supplementary material
Source: MDPI journal article supplement (https://www.mdpi.com/2071-1050/13/14/7767)
Supplement: s1 [file s1 › sustainability-1270117-supplementary.pdf]

## Supplementary Figures and Table

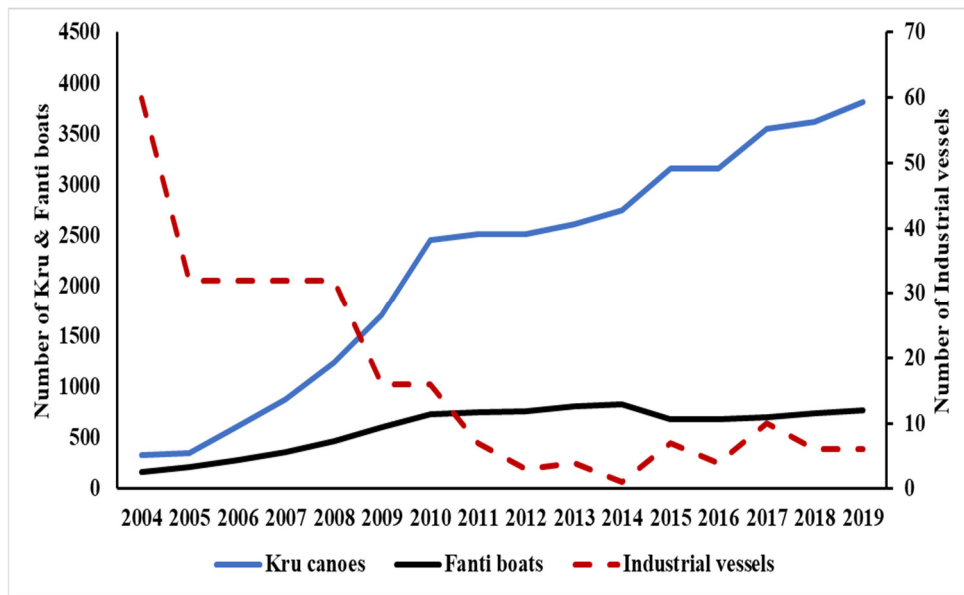

**Figure S1.** Changes in coastal fleets in Liberia. Source: National Fisheries & Aquaculture Authority (NaFAA) (2018).

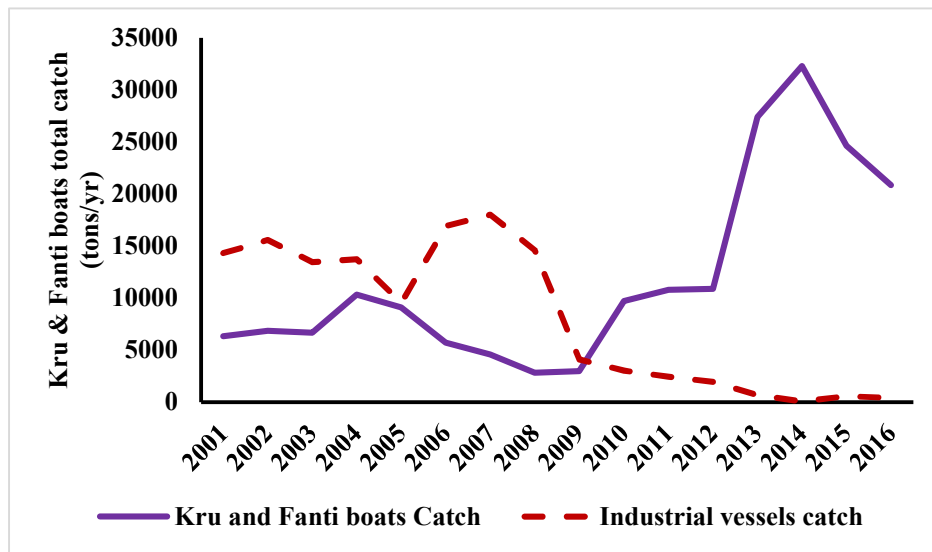

**Figure S2.** Catch development of the Liberian coastal fleets. Source: National Fisheries & Aquaculture Authority (NaFAA) (2018).

**Table S1.** Generalized likelihood test ratio tests of hypothesis for parameters of SPF and technical inefficiency models for the small-scale fisheries in Liberia.

| Null hypothesis                                                                        | Log-likelihood value | Critical value ( $\chi^2$ ) | Decision       |
|----------------------------------------------------------------------------------------|----------------------|-----------------------------|----------------|
| <b>Kru canoes</b>                                                                      |                      |                             |                |
| $H_0: \gamma = \delta_0 = \delta_1 = \delta_2 = 0$                                     | -49.64               | 0.45                        | fail to reject |
| $H_0: \beta_{11} = \beta_{22} = \beta_{33} = \beta_{12} = \beta_{13} = \beta_{23} = 0$ | -49.64               | 12.59*                      | reject $H_0$   |
| $H_0: \delta_1 = \delta_2 = 0$                                                         | -45.53               | 15.03*                      | reject $H_0$   |
| <b>Fanti Boats</b>                                                                     |                      |                             |                |
| $H_0: \gamma = \delta_0 = \delta_1 = \delta_2 = \dots = \delta_6 = 0$                  | -142.38              | 1.64                        | fail to reject |
| $H_0: \beta_{11} = \beta_{22} = \beta_{33} = \beta_{12} = \beta_{13} = \beta_{23} = 0$ | -142.38              | 16.81**                     | reject $H_0$   |
| $H_0: \delta_1 = \delta_2 = \dots = \delta_6 = 0$                                      | -136.16              | 22.46***                    | reject $H_0$   |

Note: \*\*\*, \*\* and \* are statistically significant at 0%, 1%, and 5%. The critical values for the hypothesis are obtained from Tab 1 of Kodde and Palm (1986).

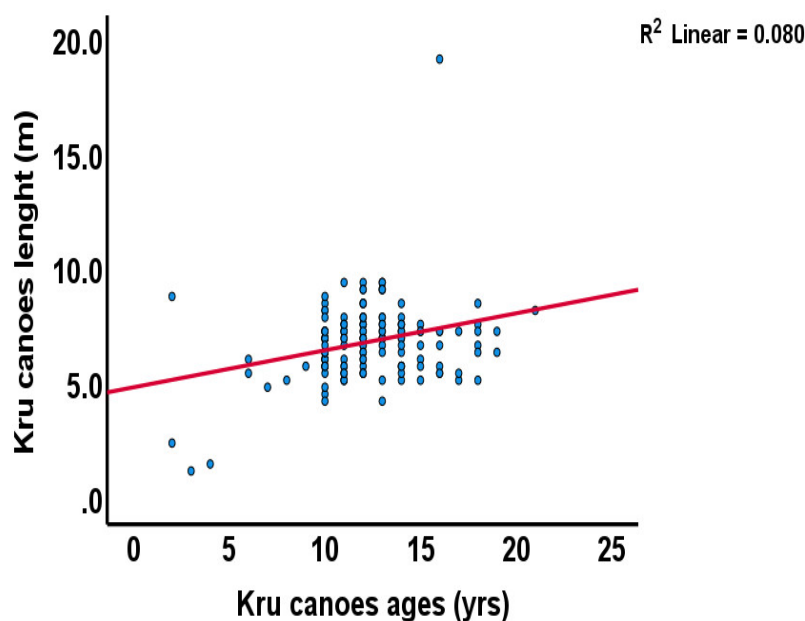

Figure S3. Variability in length by age of Kru canoes.

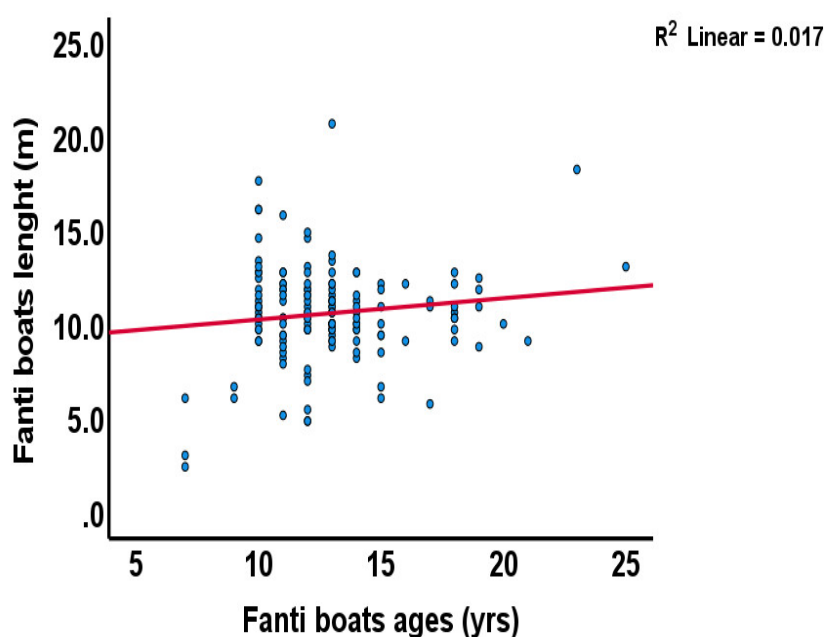

Figure S4. Variability in length by age of Fanti boats
